# Supplementary material for: Self-assembly and controllable synthesis of graphene hydrogel adsorbents with enhanced removal of ciprofloxacin from aqueous solutions
Source: Royal Society of Chemistry journal article supplement (doi:10.1039/c6ra19474e), 2016-01-01
Supplement: c6ra19474e1.pdf [file c6ra19474e1.pdf]

## Supporting Information

### **Self-assembly and Controllable Synthesis of Graphene Hydrogel Adsorbents with Enhanced Removal of Ciprofloxacin from Aqueous Solutions**

Jie Ma<sup>1,2\*</sup>, Yiran Sun<sup>1</sup>, Fei Yu<sup>1,2</sup>

1 State Key Laboratory of Pollution Control and Resource Reuse, School of  
Environmental Science and Engineering, Tongji University, 1239 Siping Road,  
Shanghai 200092, P. R. China. Tel: 86-21-6598 1831; E-mail: [jma@tongji.edu.cn](mailto:jma@tongji.edu.cn)

2 College of Chemistry and Environmental Engineering, Shanghai Institute of  
Technology, Shanghai 2001418, China;

**Table S1. XRD patterns and related data of the GHs.**

| Parameters      | Adsorbent | 2 $\theta$ (°) | Interlayer spacing<br>(nm) |
|-----------------|-----------|----------------|----------------------------|
| -               | Graphite  | 26.5           | 0.345                      |
| -               | GO        | 11.0           | 0.807                      |
| Reductant       | GSSG-G    | 23             | 0.394                      |
|                 | GSH-G     | 24.6           | 0.370                      |
| Capping reagent | GSH-G     | 24.6           | 0.370                      |
|                 | VC-G-1    | 25             | 0.364                      |
| Temperature     | VC-G-2    | 24             | 0.379                      |
|                 | VC-G-3    | 25.5           | 0.358                      |
| pH              | VC-G-3    | 25.5           | 0.358                      |
|                 | VC-Na-G   | 23             | 0.394                      |

**Table S2. BET surface area and related data for the GHs.**

| Parameters      | Adsorbent | SSA (m <sup>2</sup> /g) | Pore volume (cm <sup>3</sup> /g) | Average pore size (nm) |
|-----------------|-----------|-------------------------|----------------------------------|------------------------|
| Reductant       | GSSG-G    | 72.81                   | 0.101                            | 3.22                   |
|                 | GSH-G     | 372.94                  | 0.634                            | 3.82                   |
| Capping reagent | GSH-G     | 372.94                  | 0.634                            | 3.82                   |
|                 | VC-G-1    | 508.56                  | 1.367                            | 10.75                  |
| Temperature     | VC-G-2    | 385.61                  | 1.127                            | 11.69                  |
|                 | VC-G-3    | 504.66                  | 1.169                            | 9.27                   |
| pH              | VC-G-3    | 504.66                  | 1.169                            | 9.27                   |
|                 | VC-Na-G   | 180.44                  | 0.429                            | 9.51                   |

**Table S3. XPS peaks and relevant information about the GHs.**

| Parameters  | Adsorbent | Element (atomic %) |       |      |      | C/O<br>(atom) | Content of –<br>COOH (%) |
|-------------|-----------|--------------------|-------|------|------|---------------|--------------------------|
|             |           | C                  | O     | N    | S    |               |                          |
| Reductant   | GSSG-G    | 71.89              | 22.16 | 4.47 | 1.48 | 3.24          | 17.87                    |
|             | GSH-G     | 76.78              | 15.71 | 5.64 | 1.87 | 4.89          | 15.42                    |
| Capping     | GSH-G     | 76.78              | 15.71 | 5.64 | 1.87 | 4.89          | 15.42                    |
| regent      | VC-G-1    | 82.14              | 17.86 | -    | -    | 4.60          | 12.81                    |
|             | VC-G-2    | 86.48              | 13.52 | -    | -    | 6.40          | 11.85                    |
| Temperature | VC-G-3    | 87.6               | 12.4  | -    | -    | 7.06          | 10.68                    |
| pH          | VC-G-3    | 87.6               | 12.4  | -    | -    | 7.06          | 10.68                    |
|             | VC-Na-G   | 86.18              | 13.82 | -    | -    | 6.24          | 7.96                     |
